# Supplementary material for: Case report: takotsubo syndrome in infectious endocarditis
Source: Springer Nature journal article supplement (doi:10.1007/s00392-020-01629-6), 2020-03-31

**A**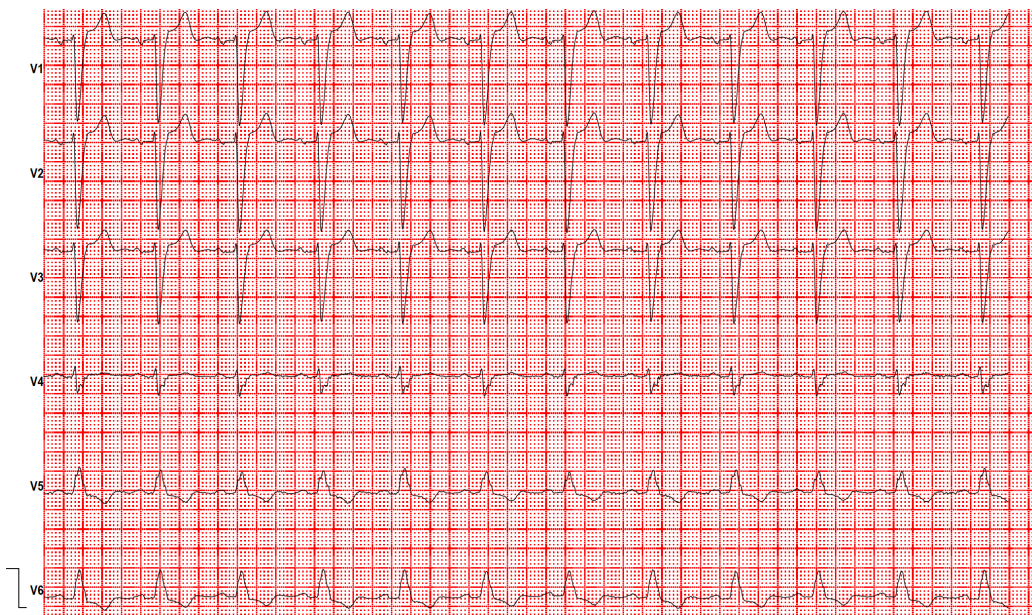**B**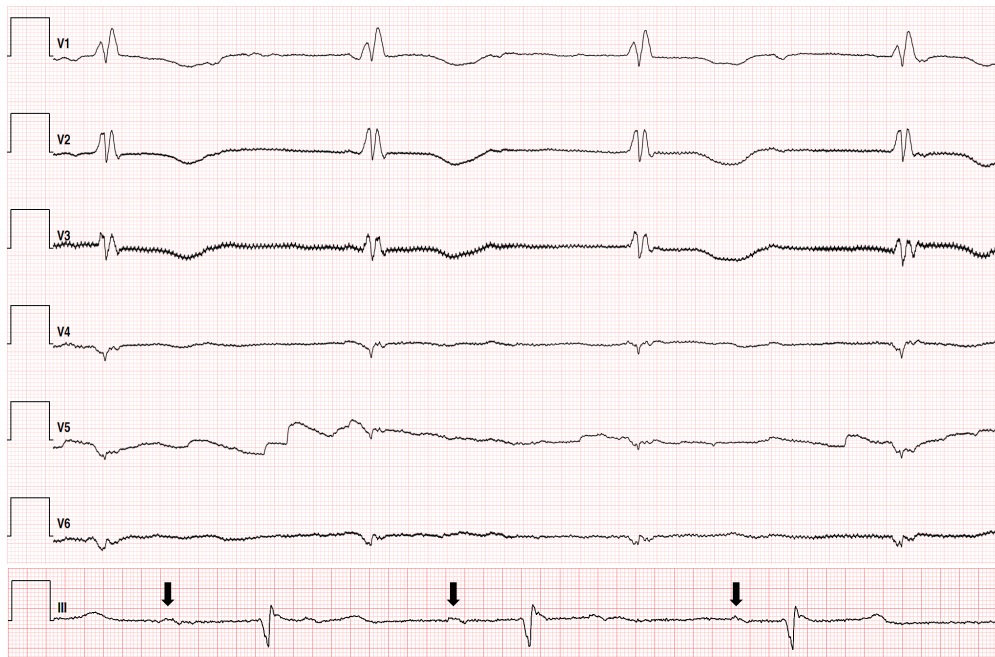

Supplement: MOESM1 [file 17852370]
